# Supplementary material
Source: PubMed Central journal article supplement (PMC7736415)
Supplement: 12250_2020_238_MOESM1_ESM.pdf [file 12250_2020_238_MOESM1_ESM.pdf]

## Electronic Supplementary Material

### Baculovirus Surface Display of Zika Virus Envelope Protein Protects against Virus Challenge in Mouse Model

Dan Luo<sup>1</sup> · Yuanjiu Miao<sup>1</sup> · Xianliang Ke<sup>1</sup> · Zhongyuan Tan<sup>1</sup> · Chun Hu<sup>2</sup> · Penghui Li<sup>1</sup> · Ting Wang<sup>1,3</sup> · Yuan Zhang<sup>1</sup> · Jianhong Sun<sup>1</sup> · Yan Liu<sup>1</sup> · Hanzhong Wang<sup>1</sup> · Zhenhua Zheng<sup>1</sup>✉

1. CAS Key Laboratory of Special Pathogens and Biosafety, Center for Emerging Infectious Diseases, Wuhan Institute of Virology, Chinese Academy of Sciences, Wuhan 430071, China;

2. Computer Center of Tongji Hospital, Tongji Medical College Huazhong University of Science & Technology, Wuhan 430030, China;

3. Wuhan Institute of Physics and Mathematics, Chinese Academy of Sciences, Wuhan 430071, China

Supporting information to DOI: 10.1007/s12250-020-00238-x

**Table S1.** Primers used in the study.

| Primers                 | Sequence (5'-3')                                            |
|-------------------------|-------------------------------------------------------------|
| F (SP+ <i>Eco</i> R I)  | 5'-CCGGAATTCATGGTAAGCGCTATTGTTTTATATG-3'                    |
| R (SP-E)                | 5'-CTGACTCCTATGCACCTGATCGCAAAGGCAGAATGCGCCG-3'              |
| F (E-SP)                | 5'-CGGCGCATTCTGCCTTTGCGATCAGGTGCATAGGAGTCAG-3'              |
| R (E-TM)                | 5'-ACTACATGACCAAACATGAATTTGAAAGCTGCTCCAAAATTTGATGGATG-3'    |
| F (TM-E)                | 5'-TCAAATTTTTGGAGCAGCTTTCAAATTCATGTTTGGTCATGTAGTTAACTTTG-3' |
| R (TM+ <i>Hind</i> III) | 5'-CCCAAGCTTTTAATATTGTCTATTACGGTTTCTAATC-3'                 |
| FpUC/M13)               | 5'-CCCAGTCACGACGTTGTA AAAACG-3'                             |
